# Supplementary material for: Tuning of feedforward control enables stable muscle force-length dynamics after loss of autogenic proprioceptive feedback
Source: eLife. 2020 Jun 23;9:e53908. doi: 10.7554/eLife.53908 (PMC7334023; doi:10.7554/eLife.53908)
Supplement: Figure 8—source data 1. — F-statistics, p-values and posthoc pairwise comparisons for linear mixed effect model ANOVA with fixed effects of treatment cohort (treatment: intact, reinnervated) and stride category (stride ID) and the interaction treatment x stride ID. Posthoc pairwise mean differences (mean ±95% ci) are shown between intact and reinnervated treatment cohorts (left), and between obstacle stride categories compared to level stride means, within treatment cohorts (intact/reinnervated). [file elife-53908-fig8-data1.csv]

Ankle joint angle at foot contact						Stride category posthoc pairwise mean difference from level terrain ( ± 95% ci)
	treatment	stride ID	interaction		Treatment cohort	Intact			Reinnervated
F-statistic	4.500335511	37.79876815	3.917672913			S -1	S 0	Str +1	S -1	S 0	Str +1
P-value	0.037893142	5.15E-14	0.012580389		-8.0±7.5	-3.3±10.1	-30.4±9.5	-0.5±10.1	4.1±9.5	-40.1±9.5	2.8±9.5
