# Supplementary material for: Tuning of feedforward control enables stable muscle force-length dynamics after loss of autogenic proprioceptive feedback
Source: eLife. 2020 Jun 23;9:e53908. doi: 10.7554/eLife.53908 (PMC7334023; doi:10.7554/eLife.53908)
Supplement: Table 1—source data 1. [file elife-53908-table1-data1.csv]

Table S1 ANOVA fixed effect p-values
	F-statistic
Variable	treatment	stride ID	interaction
Wnet	1.1830E-01	1.8361E-130	5.9028E-06
Fpk	4.7123E-01	1.6298E-24	7.8177E-50
LpkF	2.1849E-01	1.1645E-173	3.7773E-32
VpkF	7.3492E-04	7.3639E-23	5.3292E-07
Tforce	6.0107E-01	1.8989E-78	7.5901E-15
Tstride	7.4830E-01	8.4094E-10	1.9283E-14
Etot	9.1981E-01	8.5896E-40	7.2940E-03
Efreq	4.7662E-02	5.5929E-07	1.1569E-01
Ephase	1.6798E-02	5.2918E-02	4.0665E-06
Edur	1.5661E-03	4.2338E-07	1.3572E-08
