# Supplementary material for: Tuning of feedforward control enables stable muscle force-length dynamics after loss of autogenic proprioceptive feedback
Source: eLife. 2020 Jun 23;9:e53908. doi: 10.7554/eLife.53908 (PMC7334023; doi:10.7554/eLife.53908)
Supplement: Table 2—source data 1. [file elife-53908-table2-data1.csv]

Table S2 P-values for posthoc pairwise comparisons
Variable	Treatment cohort	Intact				Reinnervated
		S -1	S 0	Str +1	S +2	S -1	S 0	Str +1	S +2
Wnet	1.18E-01	2.78E-05	1.24E-85	1.00E+00	1.83E-14	1.00E+00	2.02E-89	9.82E-01	1.00E+00
Fpk	4.71E-01	1.00E+00	5.98E-16	1.00E+00	8.59E-02	2.36E-04	7.68E-166	1.02E-03	2.07E-01
LpkF	2.18E-01	6.59E-05	8.35E-122	2.93E-01	3.30E-15	2.36E-30	1.19E-195	2.41E-29	3.20E-27
VpkF	7.35E-04	1.00E+00	2.45E-19	1.00E+00	1.00E+00	1.41E-04	2.30E-01	4.33E-03	2.35E-12
Tforce	6.01E-01	8.67E-01	1.52E-61	1.00E+00	4.88E-02	5.30E-32	1.26E-27	5.71E-13	2.79E-28
Tstride	7.48E-01	1.00E+00	2.03E-04	1.40E-02	1.00E+00	3.60E-27	8.38E-06	3.49E-04	7.03E-06
Etot	9.20E-01	1.00E+00	1.13E-41	1.00E+00	6.90E-03	8.36E-02	1.74E-35	1.50E-07	1.00E+00
Efreq	4.77E-02	1.00E+00	2.71E-06	1.00E+00	1.00E+00	1.00E+00	2.39E-12	1.00E+00	2.63E-02
Ephase	1.68E-02	1.00E+00	1.00E+00	1.00E+00	2.93E-01	1.00E+00	1.35E-09	1.00E+00	1.00E+00
Edur	1.57E-03	1.00E+00	7.35E-06	1.00E+00	1.00E+00	8.72E-08	1.00E+00	1.00E+00	1.31E-06
