# Supplementary figures and images for: Tuning of feedforward control enables stable muscle force-length dynamics after loss of autogenic proprioceptive feedback
Source: eLife journal article supplement (doi:10.7554/elife.53908), 2020-06-23

Figure 2-figure supplement 1

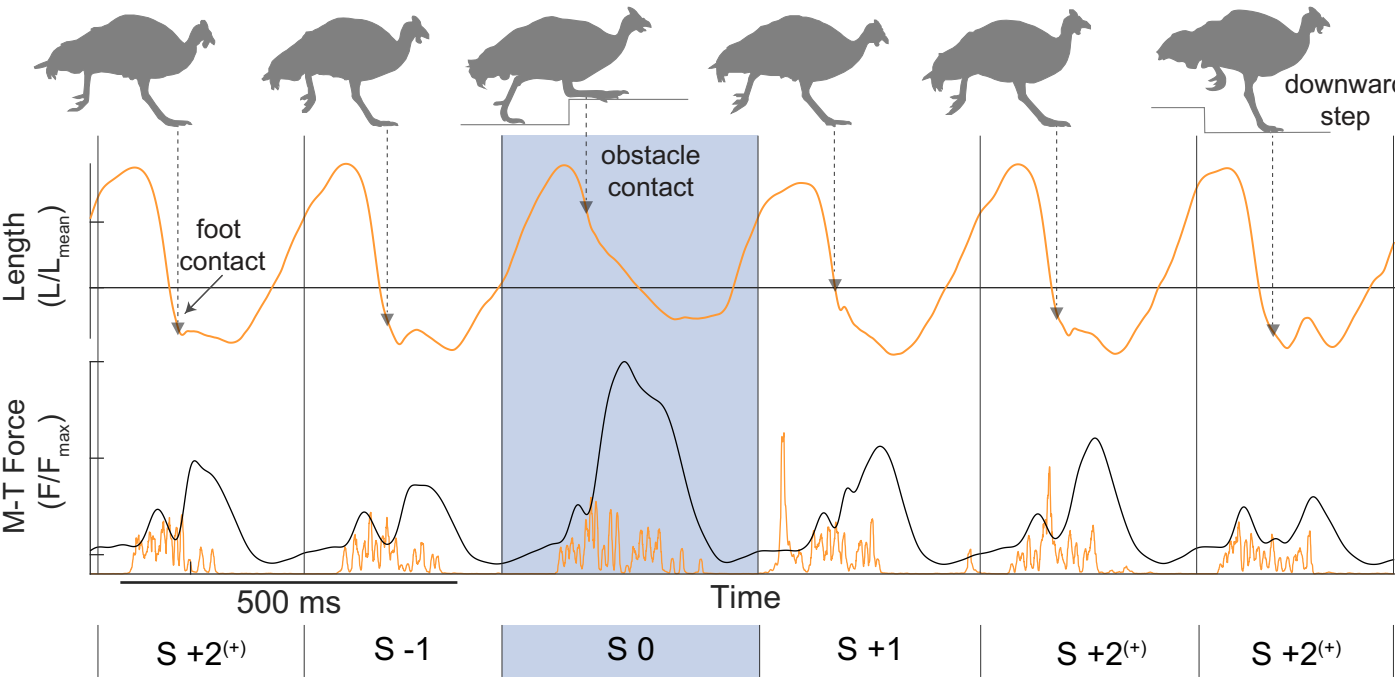

Supplement: supp [file elife_poa_e53908_Figure_2_figure_supplement_1.pdf › elife_poa_e53908_Figure_2_figure_supplement_1.pdf]

Figure 5-figure supplement 1

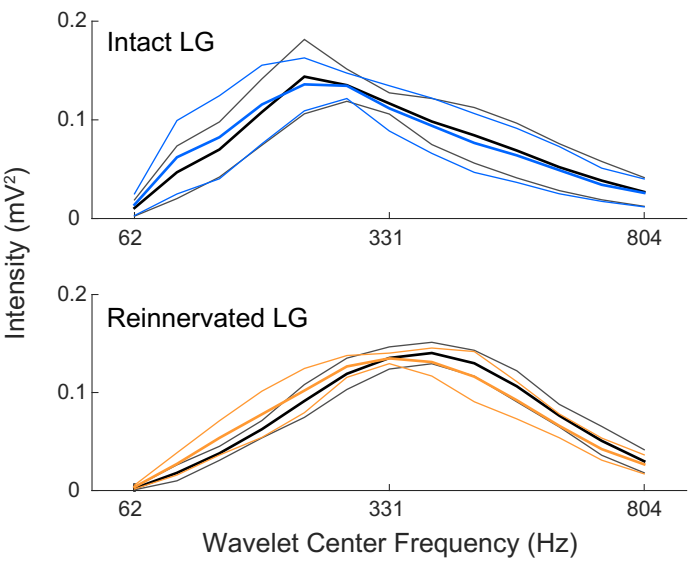

Supplement: supp [file elife_poa_e53908_Figure_5_figure_supplement_1.pdf › elife_poa_e53908_Figure_5_figure_supplement_1.pdf]

Figure 7-figure supplement 1

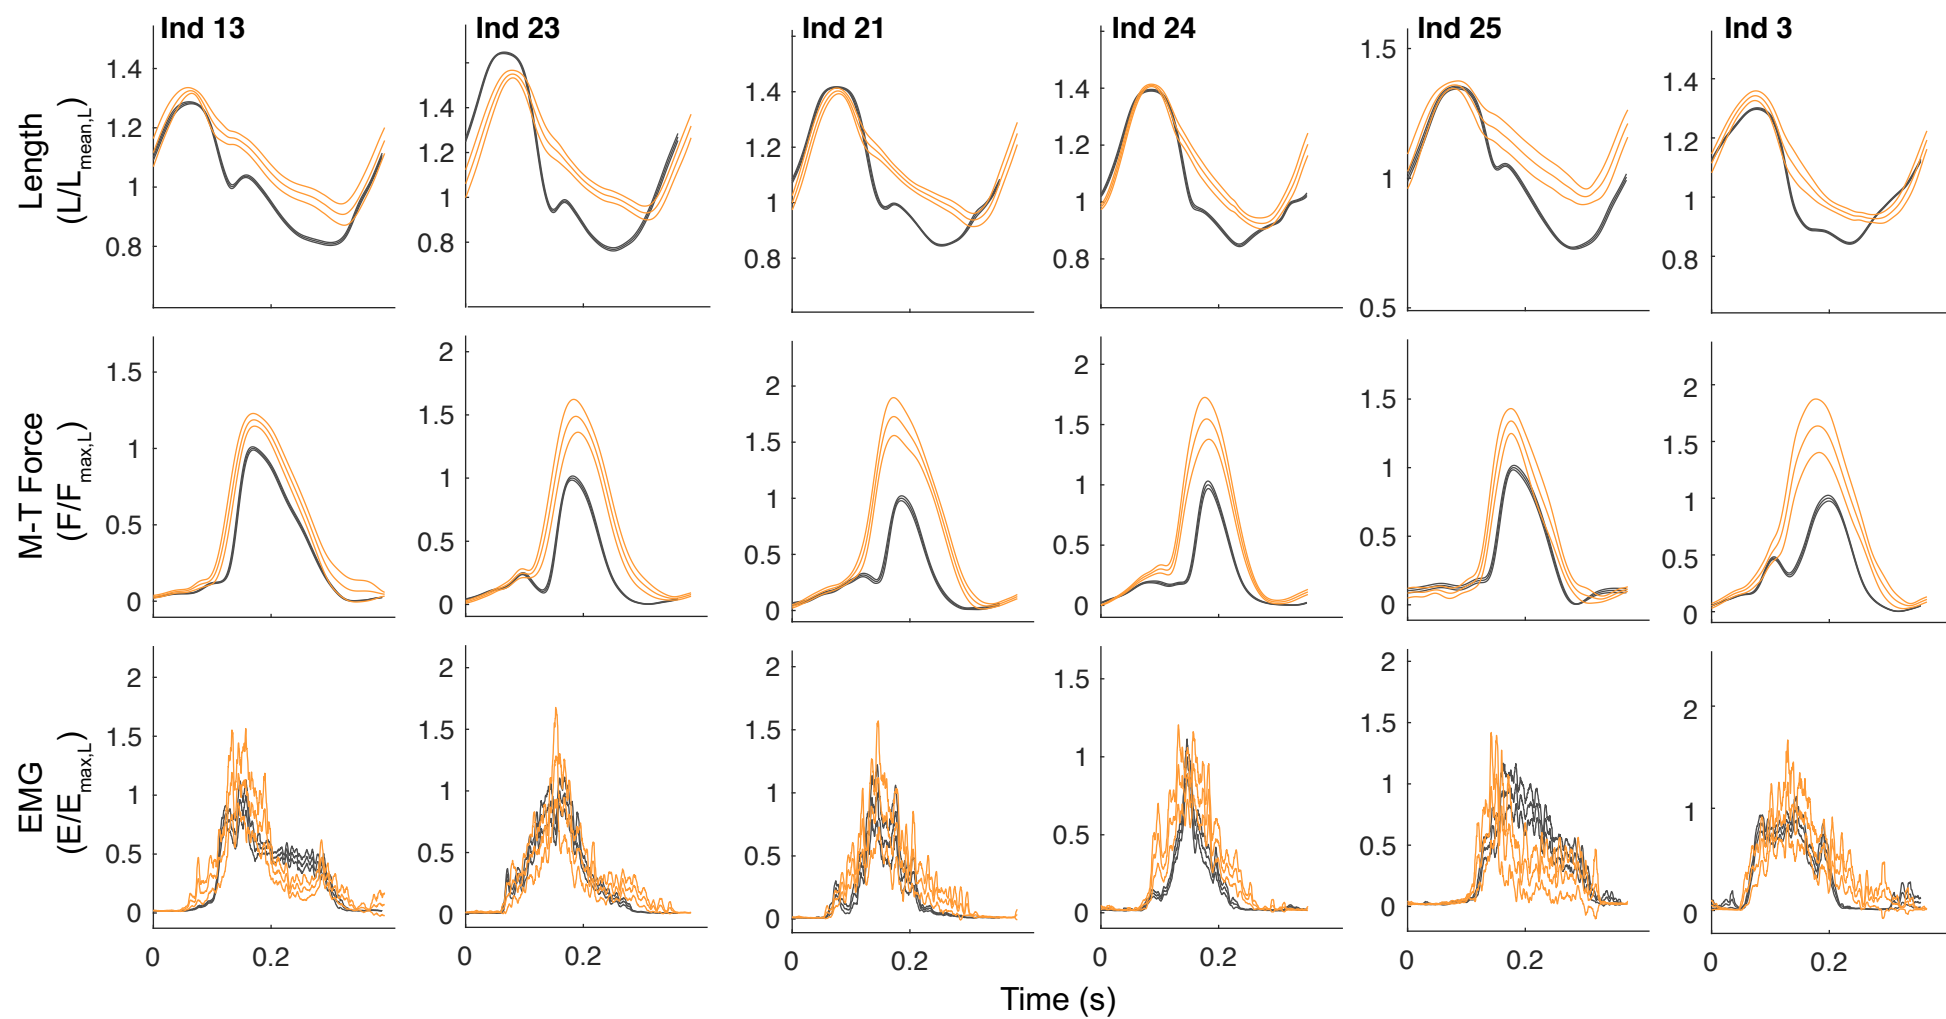

Supplement: supp [file elife_poa_e53908_Figure_7_figure_supplement_1.pdf › elife_poa_e53908_Figure_7_figure_supplement_1.pdf]
